# Supplementary material for: Religious Service Attendance and Lower Depression Among Women—a Prospective Cohort Study
Source: Springer Nature journal article supplement (doi:10.1007/s12160-016-9813-9), 2016-07-08
Supplement: MOESM1 [file 12160_2016_9813_moesm1_esm.doc]

ONLINE SUPPLEMENT: Supplementary Table 1. Baseline Characteristics of 48,984 Nurses’ Health Study Participants by Categories of Depressive Symptoms in 1996.

|  | **Depressive symptoms in 1996*** | |
| --- | --- | --- |
|  | **Not depressed**  N=42,014 | **Depressed**  N=6,973 |
| Religious service attendance in 1992, % |  |  |
| Never | 24 | 27 |
| Less than once/wk. | 22 | 24 |
| Once/wk. | 37 | 34 |
| More than once/wk. | 17 | 15 |
| Religious service attendance in 1996, % |  |  |
| Never | 24 | 29 |
| Less than once/wk. | 16 | 18 |
| Once/wk. | 41 | 37 |
| More than once/wk. | 19 | 16 |
| Religious beliefs, % |  |  |
| Catholic | 41 | 41 |
| Protestant | 53 | 52 |
| Body Mass Index (BMI) , % |  |  |
| <18 kg/m2 | 17 | 18 |
| 18.1-21 kg/m2 | 33 | 30 |
| 21.1-23 kg/m2 | 24 | 21 |
| 23.1-25 kg/m2 | 19 | 21 |
| 25.1-27 kg/m2 | 4 | 5 |
| 27.1-30 kg/m2 | 2 | 3 |
| 30+ kg/m2 | 1 | 2 |
| Age, years | 61.6(7.1) | 61.5(7.1) |
| Physical activity, MET-hrs. /wk. | 2.0 (2.3) | 1.7(2.2) |
| Hypertension, % | 26 | 30 |
| Hypercholesterolemia, % | 41 | 46 |
| Diabetes, % | 3 | 5 |
| Weight change since age 18, kg | 12.9(25.1) | 15.6(28.4) |
| Alternative Healthy Eating Index 2010, continuous | 47.6(10.3) | 46.8(10.3) |
| Alcohol intake (g/day), % |  |  |
| 0 | 45 | 52 |
| < 5 | 30 | 27 |
| 5.1- 15 | 17 | 14 |
| 15.4-30 | 5 | 4 |
| >30 | 3 | 3 |
| Mental Health Index in 1992, continuous | 78.7(12.5) | 66.6(18.0) |
| Smoking status, % |  |  |
| Never | 47 | 42 |
| Past | 41 | 42 |
| Current | 12 | 16 |
| Number of close friends, continuous | 3.4(1.0) | 3.2(1.1) |
| Have someone close to talk to, % | 94 | 92 |
| Live alone, % | 14 | 12 |
| Not employed in last 2 years, % | 38 | 28 |
| Currently married, % | 80 | 54 |
| Race/ethnicity, % |  |  |
| Caucasian | 97 | 97 |
| African American | 1 | 1 |
| Have physical/functional limitations, % | 45 | 66 |

Values are means (SD) or percentages and are standardized to the age distribution of the study population

* Measured by Mental Health Index. Higher score represent less depressive symptoms. Depression was defined as MHI ≤52.

**Supplementary Table 2A. Multivariate Associations Between Religious Services Attendance and Depression Stratified by Religious Denominations.**

|  | **Odds ratio and its 95%CI for depression by religious denominations** | | | |
| --- | --- | --- | --- | --- |
|  | **Protestant** | | **Catholic** | |
| N | 24751 |  | 19163 |  |
| **Religious service attendance in 1996** | **Odds ratios** | **95% CI** | **Odds ratios** | **95% CI** |
| Never | Reference |  | Reference |  |
| < 1/wk. | 0·98 | 0·85, 1·13 | 1·11 | 0·91, 1·36 |
| 1/wk. | 1·08 | 0·92, 1·28 | 1·11 | 0·89, 1·39 |
| > 1/wk. | 1·13 | 0·92, 1·38 | 1·29 | 0·99, 1·68 |
| **Religious service attendance in 2000** |  |  |  |  |
| Never | Reference |  | Reference |  |
| < 1/wk. | 0·90 | 0·79, 1·02 | 0·88 | 0·73, 1·06 |
| 1/wk. | 0·78 | 0·67, 0·90 | 0·81 | 0·68, 0·97 |
| > 1/wk. | 0·79 | 0·66, 0·94 | 0·72 | 0·58, 0·90 |
| **P for interaction** | 0·20 |  |  |  |

CI: confidence interval

Multivariate model adjusted for age (years), baseline depressive symptom in 1992(continuous), baseline religious service attendance in 1992 (never, less than once/week, once/week, more than once/week), live alone (yes, no), not employed in the past 2 years (yes, no), marital status (currently married, yes, no), nurses’ education level (high school, bachelor, master), husband education level (under high school, high school graduate, college or above), postmenopausal hormone use (never, current, past), race/ethnic groups(Caucasian, African American, Asian, Hispanic, other), geographic region (middle, north, south), census track level median family income (dollars per year, continuous), height (continuous), family history of Myocardial Infarction(yes, no), family history of cancer(yes, no), family history of diabetes(yes, no), body mass index (BMI,<18, 18.1-21, 21.1-23, 23.1-25, 25.1-27, 27.1-30, >30+ kg/m2), weight change since age 18 (kg), physical activity (MET hrs./wk.), hypertension(yes, no), hypercholesterolemia (yes, no), diabetes(yes, no), diet quality (Alternative Healthy Eating Index 2010, continuous), alcohol consumption (0, <5, 5.1-15, 15.4-30, >30 g/day), number of close friends (continuous), have someone close to talk to(yes, no), smoking status (never, current, past), physical/functional limitations (yes, no).

Results were calculated from logistic regression model.

Supplementary Table 2B. Multivariate Associations Between Depression and Subsequent Frequent Religious Services Attendance (≥once/week) by Religious Denominations.

|  | **and its** |  | **Religious service attendance**  **(≥ 1/week) in 2004** | | **P for interaction** |
| --- | --- | --- | --- | --- | --- |
| **Religious denominations** | |  | **Odds ratio** | **95% CI** |  |
| **Protestant** | **Depression in 1996** | **No** | Reference |  | 0·09 |
|  |  | **Yes** | 0·95 | 0·84, 1·07 |  |
|  | **Depression in 2000** | **No** | Reference |  |  |
|  |  | **Yes** | 0·77 | 0·69, 0·86 |  |
| **Catholic** | **Depression in 1996** | **No** | Reference |  |  |
|  |  | **Yes** | 0·84 | 0·73, 0·97 |  |
|  | **Depression in 2000** | **No** | Reference |  |  |
|  |  | **Yes** | 0·74 | 0·65, 0·84 |  |

Multivariate model adjusted for age (years), baseline depressive symptom in 1992(continuous), baseline religious service attendance in 1992 (never, less than once/week, once/week, more than once/week), live alone (yes, no), not employed in the past 2 years (yes, no), marital status (currently married, yes, no), nurses’ education level (high school, bachelor, master), husband education level (under high school, high school graduate, college or above), postmenopausal hormone use (never, current, past), race/ethnic groups(Caucasian, African American, Asian, Hispanic, other), geographic region (middle, north, south), census track level median family income (dollars per year, continuous), height (continuous), family history of Myocardial Infarction(yes, no), family history of cancer(yes, no), family history of diabetes(yes, no), body mass index (BMI,<18, 18.1-21, 21.1-23, 23.1-25, 25.1-27, 27.1-30, >30+ kg/m2), weight change since age 18 (kg), physical activity (MET hrs./wk.), hypertension(yes, no), hypercholesterolemia (yes, no), diabetes(yes, no), diet quality (Alternative Healthy Eating Index 2010, continuous), alcohol consumption (0, <5, 5.1-15, 15.4-30, >30 g/day), number of close friends (continuous), have someone close to talk to(yes, no), smoking status (never, current, past), physical/functional limitations (yes, no).

Marginal structural model with weights accounted for censoring and missing data.

Supplementary Table 3. Associations Between Depression and Other Variables

|  | ***Odds Ratio*** | ***Lower OR*** | ***Upper OR*** |
| --- | --- | --- | --- |
| Body Mass Index, kg/m2 |  |  |  |
| <19 | 0·99 | 0·90 | 1·10 |
| 19-20.9 | 0·98 | 0·90 | 1·07 |
| 21-22.9 | 0·96 | 0·88 | 1·06 |
| 23-24.9 | Reference |  |  |
| 25-26.9 | 1·07 | 0·93 | 1·25 |
| 27-29.9 | 1·24 | 1·04 | 1·47 |
| >30 | 1·37 | 1·09 | 1·72 |
| Physical activity, 10 METS/wk | 0·97 | 0·95 | 0·98 |
| Alcohol consumption, g/day |  |  |  |
| <5 | 0·87 | 0·80 | 0·94 |
| 5-15 | 0·85 | 0·76 | 0·95 |
| 15-30 | 0·91 | 0·77 | 1·07 |
| >30 | 0·91 | 0·74 | 1·12 |
| Have someone close to talk to | 0·96 | 0·86 | 1·07 |
| Number of close friends, continuous | 0·96 | 0·93 | 0·99 |
| No physical function limitations | 0·58 | 0·55 | 0·62 |
| Currently married | 1·05 | 0·94 | 1·18 |
| Current smoker | 0·64 | 0·25 | 1·66 |
| Nurses Education level | 0·95 | 0·91 | 0·99 |

Multivariate model adjusted for age (years), baseline depressive symptom in 1992(continuous), baseline religious service attendance in 1992 (never, less than once/week, once/week, more than once/week), live alone (yes, no), not employed in the past 2 years (yes, no), marital status (currently married, yes, no), nurses’ education level (high school, bachelor, master), husband education level (under high school, high school graduate, college or above), postmenopausal hormone use (never, current, past), race/ethnic groups(Caucasian, African American, Asian, Hispanic, other), geographic region (middle, north, south), census track level median family income (dollars per year, continuous), height (continuous), family history of Myocardial Infarction(yes, no), family history of cancer(yes, no), family history of diabetes(yes, no), body mass index (BMI,<18, 18.1-21, 21.1-23, 23.1-25, 25.1-27, 27.1-30, >30+ kg/m2), weight change since age 18 (kg), physical activity (MET hrs./wk.), hypertension(yes, no), hypercholesterolemia (yes, no), diabetes(yes, no), diet quality (Alternative Healthy Eating Index 2010, continuous), alcohol consumption (0, <5, 5.1-15, 15.4-30, >30 g/day), number of close friends (continuous), have someone close to talk to(yes, no), smoking status (never, current, past), physical/functional limitations (yes, no).

**Supplementary Table 4A. Sensitivity analyses of the associations between religious services attendance in 1996 and 2000 with subsequent onset of depression in 2004**

|  | **Included participants with cancer or cardiovascular diseases** | | **Among participants with cancer or cardiovascular diseases only** | |
| --- | --- | --- | --- | --- |
|  | **Odds ratios** | **95% CI** | **Odds ratios** | **95% CI** |
| **Religious service attendance in 1996** | | | | |
| Never | Reference |  | Reference |  |
| < 1/wk. | 0.99 | 0·86, 1·15 | 0.89 | 0·63, 1·25 |
| 1/wk· | 1·09 | 0·92, 1·29 | 0.90 | 0·60, 1·35 |
| > 1/wk· | 1·08 | 0·89, 1·32 | 0.79 | 0·49, 1·27 |
| **Religious service attendance in 2000** | | | | |
| Never | Reference |  | Reference |  |
| < 1/wk· | 0·84 | 0·74, 0·96 | 0·90 | 0·65, 1.25 |
| 1/wk· | 0·62 | 0·54, 0·72 | 0·64 | 0·45, 0·90 |
| > 1/wk· | 0·57 | 0·48, 0·68 | 0·56 | 0·38, 0·84 |

CI: confidence interval

Multivariate model adjusted for age (years), baseline depressive symptom in 1992(continuous), baseline religious service attendance in 1992 (never, less than once/week, once/week, more than once/week), live alone (yes, no), not employed in the past 2 years (yes, no), marital status (currently married, yes, no), nurses’ education level (high school, bachelor, master), husband education level (under high school, high school graduate, college or above), postmenopausal hormone use (never, current, past), race/ethnic groups(Caucasian, African American, Asian, Hispanic, other), geographic region (middle, north, south), census track level median family income (dollars per year, continuous), height (continuous), family history of Myocardial Infarction(yes, no), family history of cancer(yes, no), family history of diabetes(yes, no), body mass index (BMI,<18, 18·1-21, 21·1-23, 23·1-25, 25·1-27, 27·1-30, >30+ kg/m2), weight change since age 18 (kg), physical activity (MET hrs·/wk·), hypertension(yes, no), hypercholesterolemia (yes, no), diabetes(yes, no), diet quality (Alternative Healthy Eating Index 2010, continuous), alcohol consumption (0, <5, 5·1-15, 15·4-30, >30 g/day), number of close friends (continuous), have someone close to talk to(yes, no), smoking status (never, current, past), physical/functional limitations (yes, no)·

Marginal structural model with weights accounted for censoring and missing data·

Binary variable of depression :Defined as participants who either self-reported a physician or clinician-diagnosed depression, or use of antidepressant medications, or CESD-10 ≥10

Supplementary Table 4B. Sensitivity analyses of multivariate associations between depression in 1996 and 2000 and subsequent frequent religious services attendance (≥once/week) in 2004

|  |  | **Religious service attendance**  **(≥ 1/week) in 2004** | | | | |
| --- | --- | --- | --- | --- | --- | --- |
|  |  | **Included participants with cancer or cardiovascular diseases** | | **Among participants with cancer or cardiovascular diseases only** | |  |
|  |  | **Odds ratio** | **95% CI** | **Odds ratio** | **95% CI** |  |
| **Depression in 1996** | **No** | Reference |  | Reference |  | |
|  | **Yes** | 0·88 | 0·82, 0.95 | 0·76 | 0·65, 0.88 | |
| **Depression in 2000** | **No** | Reference |  | Reference |  | |
|  | **Yes** | 0·74 | 0·69, 0·79 | 0·70 | 0·61, 0·80 | |

Multivariate model adjusted for age (years), baseline depressive symptom in 1992(continuous), baseline religious service attendance in 1992 (never, less than once/week, once/week, more than once/week), live alone (yes, no), not employed in the past 2 years (yes, no), marital status (currently married, yes, no), nurses’ education level (high school, bachelor, master), husband education level (under high school, high school graduate, college or above), postmenopausal hormone use (never, current, past), race/ethnic groups(Caucasian, African American, Asian, Hispanic, other), geographic region (middle, north, south), census track level median family income (dollars per year, continuous), height (continuous), family history of Myocardial Infarction(yes, no), family history of cancer(yes, no), family history of diabetes(yes, no), body mass index (BMI,<18, 18.1-21, 21.1-23, 23.1-25, 25.1-27, 27.1-30, >30+ kg/m2), weight change since age 18 (kg), physical activity (MET hrs./wk.), hypertension(yes, no), hypercholesterolemia (yes, no), diabetes(yes, no), diet quality (Alternative Healthy Eating Index 2010, continuous), alcohol consumption (0, <5, 5.1-15, 15.4-30, >30 g/day), number of close friends (continuous), have someone close to talk to(yes, no), smoking status (never, current, past), physical/functional limitations (yes, no).

Marginal structural model with weights accounted for censoring and missing data.
